# Supplementary material
Source: PubMed Central journal article supplement (PMC5292240)
Supplement: NIHMS844441-supplement-SupplementalMaterial.pdf [file NIHMS844441-supplement-SupplementalMaterial.pdf]

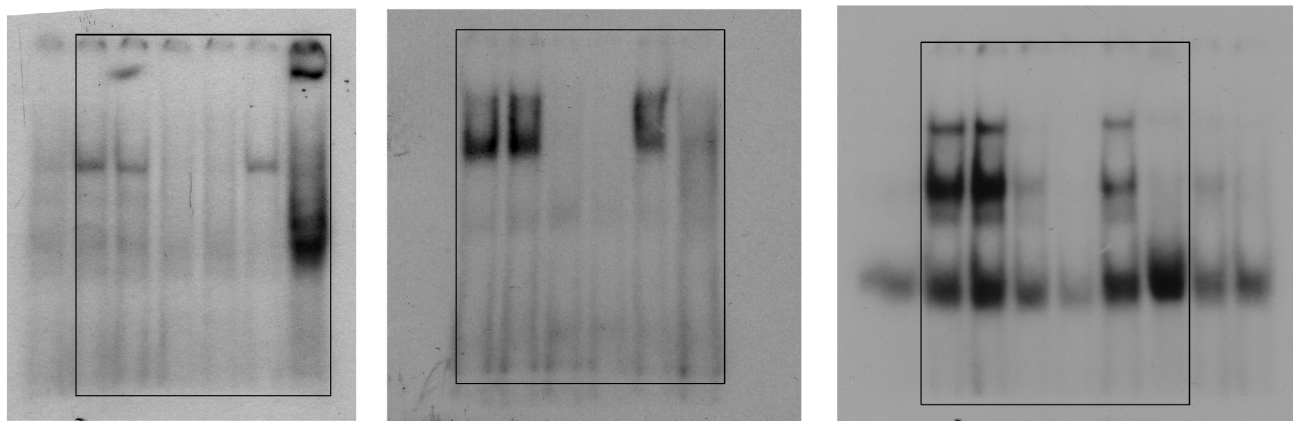

Extended Data Figure 10a

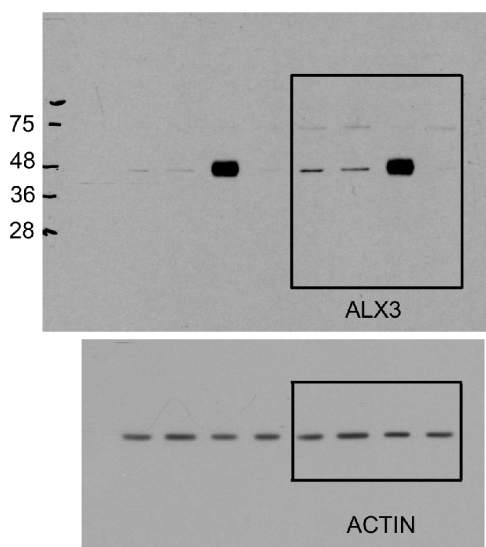

Extended Data Figure 6b

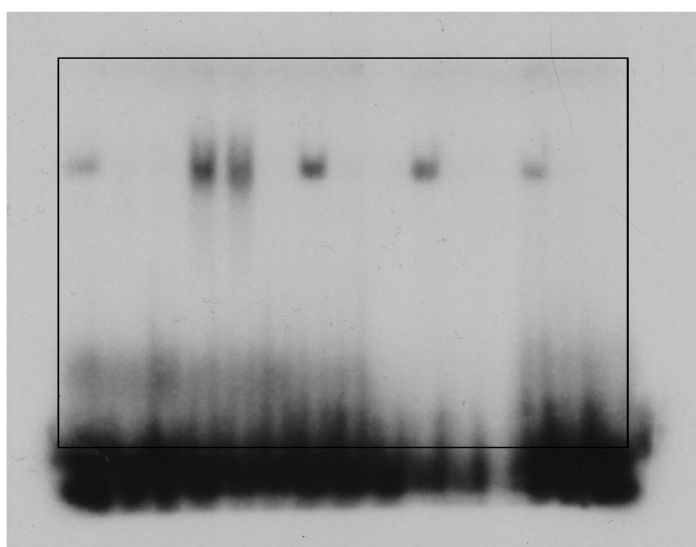

Extended Data Figure 10b

Supplementary Table 1a

| Gene symbol | Mean count across all samples | Log2 fold-change Light/Dark | P-value  | Q-value (FDR) |
|-------------|-------------------------------|-----------------------------|----------|---------------|
| ALX3        | 56                            | 2.75                        | 7.82E-22 | 1.16E-17      |
| ASIP        | 131                           | 1.9                         | 6.04E-14 | 3.00E-10      |
| DCT         | 1917                          | -0.15                       | 2.58E-02 | 5.35E-01      |
| EDN3        | 643                           | -0.49                       | 1.26E-08 | 2.14E-05      |
| GPR143      | 360                           | -0.67                       | 3.11E-08 | 4.21E-05      |
| KIT         | 1682                          | -0.06                       | 2.85E-01 | 9.87E-01      |
| MC1R        | 605                           | -0.45                       | 2.19E-07 | 1.72E-04      |
| MITF        | 1357                          | -0.12                       | 2.84E-02 | 5.60E-01      |
| MLANA       | 435                           | -0.31                       | 1.14E-02 | 3.78E-01      |
| OCA2        | 398                           | -0.98                       | 4.52E-08 | 4.80E-05      |
| POMC        | 19                            | -0.16                       | 4.55E-01 | 1.00E+00      |
| SLC7A11     | 418                           | 0.02                        | 8.28E-01 | 1.00E+00      |
| TBX3        | 294                           | -0.01                       | 9.45E-01 | 1.00E+00      |
| TRPM1       | 1012                          | -0.52                       | 7.01E-06 | 2.98E-03      |
| TYR         | 1968                          | -0.77                       | 3.07E-10 | 7.61E-07      |
| TYRP1       | 4871                          | -0.96                       | 1.56E-07 | 1.29E-04      |

Supplementary Table 1b

| Gene symbol | Mean count across all samples | Log2 fold-change Light/Flank | P-value  | Q-value (FDR) |
|-------------|-------------------------------|------------------------------|----------|---------------|
| ALX3        | 56                            | 2.11                         | 2.47E-14 | 4.09E-11      |
| ASIP        | 131                           | 0.32                         | 1.88E-01 | 5.22E-01      |
| DCT         | 1917                          | -0.11                        | 9.74E-02 | 3.67E-01      |
| EDN3        | 643                           | 0.01                         | 8.71E-01 | 9.56E-01      |
| GPR143      | 360                           | 0.21                         | 8.89E-02 | 3.50E-01      |
| KIT         | 1682                          | 0.02                         | 7.32E-01 | 9.07E-01      |
| MC1R        | 605                           | 0.21                         | 1.39E-02 | 1.11E-01      |
| MITF        | 1357                          | 0.17                         | 1.61E-03 | 2.41E-02      |
| MLANA       | 435                           | 0.2                          | 9.79E-02 | 3.68E-01      |
| OCA2        | 398                           | 0.33                         | 6.75E-02 | 2.99E-01      |
| POMC        | 19                            | -0.16                        | 4.26E-01 | 7.53E-01      |
| SLC7A11     | 418                           | 0.3                          | 4.23E-03 | 4.86E-02      |
| TBX3        | 294                           | -0.32                        | 2.56E-03 | 3.33E-02      |
| TRPM1       | 1012                          | 0.3                          | 1.04E-02 | 9.06E-02      |
| TYR         | 1968                          | 0.18                         | 1.44E-01 | 4.52E-01      |
| TYRP1       | 4871                          | 0.16                         | 3.85E-01 | 7.17E-01      |

Supplementary Table 1c

| Gene symbol | Mean count across all samples | Log <sub>2</sub> fold-change Dark/Flank | P-value  | Q-value (FDR) |
|-------------|-------------------------------|-----------------------------------------|----------|---------------|
| ALX3        | 56                            | 0.64                                    | 3.21E-02 | 2.27E-01      |
| ASIP        | 131                           | 1.58                                    | 5.31E-10 | 2.35E-07      |
| DCT         | 1917                          | -0.04                                   | 5.66E-01 | 8.60E-01      |
| EDN3        | 643                           | -0.5                                    | 4.79E-09 | 1.57E-06      |
| GPR143      | 360                           | -0.87                                   | 4.94E-13 | 4.36E-10      |
| KIT         | 1682                          | -0.08                                   | 1.58E-01 | 5.12E-01      |
| MC1R        | 605                           | -0.66                                   | 2.42E-14 | 2.63E-11      |
| MITF        | 1357                          | -0.29                                   | 9.32E-08 | 1.88E-05      |
| MLANA       | 435                           | -0.51                                   | 2.92E-05 | 2.24E-03      |
| OCA2        | 398                           | -1.31                                   | 3.15E-13 | 2.97E-10      |
| POMC        | 19                            | 0.01                                    | 9.66E-01 | NA            |
| SLC7A11     | 418                           | -0.27                                   | 8.37E-03 | 1.02E-01      |
| TBX3        | 294                           | 0.31                                    | 3.26E-03 | 5.82E-02      |
| TRPM1       | 1012                          | -0.81                                   | 1.78E-12 | 1.26E-09      |
| TYR         | 1968                          | -0.95                                   | 8.79E-15 | 1.13E-11      |
| TYRP1       | 4871                          | -1.12                                   | 9.67E-10 | 3.80E-07      |

**Supplementary Table 1. Detailed results of RNA-Seq analysis for pigmentation genes.** **a**, Samples obtained from the light and dark stripes. **b**, Samples obtained from the light stripe and the flank. **c**, Samples obtained from the dark stripe and the flank. Four columns are included for each detected gene, displaying the average overall expression level (normalized gene counts), a log<sub>2</sub> fold-change between samples from the compared regions, as well as the degree of statistical significance of the observed differences expressed as *P*-values and *Q*-values (adjusted for multiple testing using the Benjamini and Hochberg correction approach). Genes are sorted alphabetically. The data presented in this table was obtained from gene counts computed using eXpress software and RNA-seq read alignments against the de novo transcriptome assembly.

### Supplementary Table 2. Oligo sequences. Sequences used for quantitative PCR (qPCR), ChIP-qPCR, and EMSA.

| Species                                | Gene/Site           | Experiment | Forward primer                           | Reverse primer                           |
|----------------------------------------|---------------------|------------|------------------------------------------|------------------------------------------|
| <i>R. pumilio</i> / <i>M. musculus</i> | <i>Alx3</i>         | qPCR       | GTTCCAGAACCGAAGAGCCA                     | GCTGAGGATGGCTGTCAGTT                     |
| <i>R. pumilio</i> / <i>M. musculus</i> | <i>Tyr</i>          | qPCR       | ACCATGACAAAGCCAAAACC                     | GGCAAATCCTCCAGTGTGT                      |
| <i>R. pumilio</i> / <i>M. musculus</i> | <i>Tyrp1</i>        | qPCR       | CTGGGTTTCTCCTGATTGG                      | GCCCCAACTCTGTCTTTTC                      |
| <i>R. pumilio</i> / <i>M. musculus</i> | <i>Pmel</i>         | qPCR       | GCACCCAACCTGTTGTTCCCT                    | AGAGATGCAAGGACCACAGC                     |
| <i>R. pumilio</i> / <i>M. musculus</i> | <i>Bactin</i>       | qPCR       | GCTACAGCTTCCACCACACA                     | TCTCCAGGGAGGAAGAGGAT                     |
| <i>M. musculus</i>                     | <i>Mitf</i>         | qPCR       | ACTTCCCTTATCCCATCCAC                     | TGAGATCCAGAGTTGTCGTACA                   |
| <i>T. striatus</i>                     | <i>Alx3</i>         | qPCR       | AATGTGGCTGGCTTCATGGG                     | CCATCACGTTGGTCCAGTTCA                    |
| <i>T. striatus</i>                     | <i>Asip</i>         | qPCR       | GTGGCACTGAACAAGAAATC                     | TTGCAGCTGTCGCGGGTGGC                     |
| <i>T. striatus</i>                     | <i>Edn3</i>         | qPCR       | ACAAGGACAAGGAGTGTGTC                     | TGGACAGTCCATAGGGCACA                     |
| <i>T. striatus</i>                     | <i>Bactin</i>       | qPCR       | CCACCATGTACCCAGGCATT                     | ACTCCTGCTTGCTGATCCAC                     |
| <i>M. musculus</i>                     | Sites 1, 2          | EMSA       | TGATTCATTAATAAAGGGGGCTCTGCCAGTGAATTAGTGT | AAACACTAATTCCTGGCAGAGCCCCCTTTTTTAATGAATC |
| <i>M. musculus</i>                     | Site 3              | EMSA       | TCTATTGTCCCATTATCGCGTCTG                 | CCAGACGCGATAATGATGGGACAATAG              |
| <i>M. musculus</i>                     | Site 4              | EMSA       | GATTTTGACAGAATAATGAGTTGCAAATA            | TATTTGCAACTCATTAAATCTGTCAAATC            |
| <i>M. musculus</i>                     | Site 5              | EMSA       | GCAGCATTATCCTAATTTCTAAATATAGA            | TCTATATTTAGAAATTAGGATAAATGCTGC           |
| <i>M. musculus</i>                     | Sites 6, 7          | EMSA       | ATGCTTCTAATTTGAGGATTAGCTGAGAA            | TTCTCAGCTAATCCTCAAATTAGGAAGCAT           |
| <i>M. musculus</i>                     | Site 8              | EMSA       | CACACATGGCATCATTATTTGGCCATTAGG           | CCTAATGGCCAATAATGATGCCATGTGTG            |
| <i>M. musculus</i>                     | Site 9              | EMSA       | AACACCATTGTCCATTAATACTACTGGAACGAAA       | TTTCGTTCCAGTAGTATTAATGGACAATGGTGT        |
| <i>M. musculus</i>                     | Site 10             | EMSA       | GCATAACTAATTAGCTTAGGTTATTATAAG           | GCTTATAATAACCTAAGCTAATTAGTTATG           |
| <i>M. musculus</i>                     | <i>Mitf</i> Site 3  | ChIP-qPCR  | CTCCTGCCCTCATTTCGTGT                     | TCCGAGGCATTTTCAGTTTTGT                   |
| <i>M. musculus</i>                     | <i>Mitf</i> Site 5  | ChIP-qPCR  | CATCCCATTTCACACAGTAAGCAGC                | AGTCCGTTTGGCATAAGCAGT                    |
| <i>M. musculus</i>                     | <i>Mitf</i> Site 10 | ChIP-qPCR  | CATGACGTCAAGCCAGCAG                      | CACCGCCGGAGACGTTATC                      |
| <i>M. musculus</i>                     | <i>Tyr</i>          | ChIP-qPCR  | AGTCATGTGCTTGCAGAAGAT                    | CAGCCAAGAACATTTTCTCCTT                   |

### Supplementary Table 3. shRNA constructs. Clone ID, target sequences and hairpin sequences for the shRNA constructs used.

| shRNA number | Clone ID           | Target sequence       | Hairpin sequence                                               |
|--------------|--------------------|-----------------------|----------------------------------------------------------------|
| 1            | TRCN0000081718     | GCTAGTCTACAGAGATACTAT | CCGG-GCTAGTCTACAGAGATACTAT-CTCGAG-ATAGTATCTCTGTAGACTAGC-TTTTTG |
| 2            | TRCN0000081719     | CCTGGCATCTATTCCATCCAT | CCGG-CCTCGTCTTCACTCAGGATGAA-CTCGAG-TTCATCCTGAGTGAACGAGG-TTTTTG |
| 3            | TRCN0000081720     | CCTGGCATCTATTCCATCCAT | CCGG-CCTGGCATCTATTCCATCCAT-CTCGAG-ATGGATGGAATAGATGCCAGG-TTTTTG |
| 4            | TRCN0000081722     | GCGTGAGCGTTATGGGAAGAT | CCGG-GCGTGAGCGTTATGGGAAGAT-CTCGAG-ATCTTCCCATAACGCTCACGC-TTTTTG |
| scrambled    | Addgene clone 1864 |                       |                                                                |
